# Supplementary material for: Waist-to-Height Ratio Is a Stronger Mediator in the Association between DASH Diet and Hypertension: Potential Micro/Macro Nutrients Intake Pathways
Source: MDPI journal article supplement (doi:10.3390/nu15092189), 2023-05-04
Supplement: s1 [file s1]

# Waist-to-Height Ratio is a Stronger Mediator in the Association between DASH Diet and Hypertension: Potential Micro/Macro Nutrients Intake Pathways

Min Yuan <sup>1,\*</sup>, Qi Li <sup>1</sup>, Can Yang <sup>1</sup>, Liping Zhi <sup>1</sup>, Weiwei Zhuang <sup>2</sup>, Xu Steven Xu <sup>3</sup> and Fangbiao Tao <sup>4,5,\*</sup>

**Table S1.** Nutrients used in current study.

| Category (count)                | NHANES Label | Variable Description               | Unit |
|---------------------------------|--------------|------------------------------------|------|
| Carbohydrate (1)                | DR1TCARB     | Carbohydrate                       | gm   |
| Protein (1)                     | DR1TPROT     | Protein                            | gm   |
| Lipids (5)                      | DR1TTFAT     | Total fat                          | gm   |
|                                 | DR1TSFAT     | Total saturated fatty acids        | gm   |
|                                 | DR1TMFAT     | Total monounsaturated fatty acids  | gm   |
|                                 | DR1TPFAT     | Total polyunsaturated fatty acids  | gm   |
|                                 | DR1TCHOL     | Cholesterol                        | mg   |
| Saturated fatty acid (8)        | DR1TS040     | SFA 4:0(Butanoic)                  | gm   |
|                                 | DR1TS060     | SFA 6:0(Hexanoic)                  | gm   |
|                                 | DR1TS080     | SFA 8:0(Octanoic)                  | gm   |
|                                 | DR1TS100     | SFA 10:0(Decanoic)                 | gm   |
|                                 | DR1TS120     | SFA 12:0(Dodecanoic)               | gm   |
|                                 | DR1TS140     | SFA 14:0(Tetradecanoic)            | gm   |
|                                 | DR1TS160     | SFA 16:0(Hexadecanoic)             | gm   |
|                                 | DR1TS180     | SFA 18:0(Octadecanoic)             | gm   |
| Monounsaturated fatty acids (4) | DR1TM161     | MFA 16:1(Hexadecenoic)             | gm   |
|                                 | DR1TM181     | MFA 18:1(Octadecenoic)             | gm   |
|                                 | DR1TM201     | MFA 20:1(Eicosenoic)               | gm   |
|                                 | DR1TM221     | MFA 22:1(Docosenoic)               | gm   |
| Polyunsaturated fatty acids (7) | DR1TP182     | PFA 18:2(Octadecadienoic)          | gm   |
|                                 | DR1TP183     | PFA 18:3(Octadecatrienoic)         | gm   |
|                                 | DR1TP184     | PFA 18:4(Octadecatetraenoic)       | gm   |
|                                 | DR1TP204     | PFA 20:4(Eicosatetraenoic)         | gm   |
|                                 | DR1TP205     | PFA 20:5(Eicosapentaenoic)         | gm   |
|                                 | DR1TP225     | PFA 22:5(Docosapentaenoic)         | gm   |
|                                 | DR1TP226     | PFA 22:6(Docosahexaenoic)          | gm   |
| Vitamin (23)                    | DR1TATOC     | Vitamin E as alpha-tocopherol      | mg   |
|                                 | DR1TATOA     | Added alpha-tocopherol (Vitamin E) | mg   |
|                                 | DR1TRET      | Retinol                            | mcg  |
|                                 | DR1TVARA     | Vitamin A, RAE                     | mcg  |
|                                 | DR1TACAR     | Alpha-carotene                     | mcg  |
|                                 | DR1TBCAR     | Beta-carotene                      | mcg  |
|                                 | DR1TCRYP     | Beta-cryptoxanthin                 | mcg  |
|                                 | DR1TLYCO     | Lycopene                           | mcg  |
|                                 | DR1TLZ       | Lutein + zeaxanthin                | mcg  |
|                                 | DR1TVB1      | Thiamin (Vitamin B1)               | mg   |
|                                 | DR1TVB2      | Riboflavin (Vitamin B2)            | mg   |
|                                 | DR1TNIAC     | Niacin                             | mg   |

|                   |          |                     |     |
|-------------------|----------|---------------------|-----|
|                   | DR1TVB6  | Vitamin B6          | mg  |
|                   | DR1TFOLA | Total folate        | mcg |
|                   | DR1TFA   | Folic acid          | mcg |
|                   | DR1TFF   | Food folate         | mcg |
|                   | DR1TFDFE | Folate, DFE         | mcg |
|                   | DR1TCHL  | Total choline       | mg  |
|                   | DR1TVB12 | Vitamin B12         | mcg |
|                   | DR1TB12A | Added vitamin B12   | mcg |
|                   | DR1TVC   | Vitamin C           | mg  |
|                   | DR1TVD   | Vitamin D (D2 + D3) | mcg |
|                   | DR1TVK   | Vitamin K           | mcg |
| Minerals (9)      | DR1TCALC | Calcium             | mg  |
|                   | DR1TPHOS | Phosphorus          | mg  |
|                   | DR1TMAGN | Magnesium           | mg  |
|                   | DR1TIRON | Iron                | mg  |
|                   | DR1TZINC | Zinc                | mg  |
|                   | DR1TCOPP | Copper              | mg  |
|                   | DR1TSODI | Sodium              | mg  |
|                   | DR1TPOTA | Potassium           | mg  |
|                   | DR1TSELE | Selenium            | mcg |
| Dietary fiber (1) | DR1TFIBE | Dietary fiber       | gm  |
| Water (1)         | DR1TMOIS | Moisture            | gm  |

**Table S2.** Association results of regressing DASH/BMI/WHtR/HTN on nutrients.

| Endpoint | Nutrients | Category     | Est     | 95% CI  |         | <i>p</i> |
|----------|-----------|--------------|---------|---------|---------|----------|
|          |           |              |         | lower   | upper   |          |
| DASH     | SODI      | Mineral      | −0.5298 | −0.5564 | −0.5031 | <0.001   |
|          | POTA      | Mineral      | 0.2831  | 0.2545  | 0.3116  | <0.001   |
|          | P182      | Nonsaturated | 0.0663  | 0.0358  | 0.0968  | <0.001   |
| BMI      | SODI      | Mineral      | 0.0403  | 0.0067  | 0.0739  | 0.0189   |
|          | POTA      | Mineral      | −0.0555 | −0.0921 | −0.0188 | 0.0030   |
|          | P182      | Nonsaturated | −0.0782 | −0.1123 | −0.0441 | <0.001   |
| WHtR     | SODI      | Mineral      | 0.0618  | 0.0292  | 0.0943  | 0.0002   |
|          | POTA      | Mineral      | −0.0987 | −0.1293 | −0.0681 | <0.001   |
|          | P182      | Nonsaturated | −0.0638 | −0.0964 | −0.0311 | 0.0001   |
| HTN      | SODI      | Mineral      | 1.0943  | 1.0053  | 1.1905  | 0.0366   |
|          | POTA      | Mineral      | 0.9306  | 0.8665  | 0.9986  | 0.0470   |
|          | P182      | Nonsaturated | 0.9051  | 0.8518  | 0.9610  | 0.0012   |

\*Est: regression coefficient for DASH, BMI and WHtR; Odds Ratio for HTN.
